# Supplementary material
Source: PubMed Central journal article supplement (PMC8504485)
Supplement: NIHMS1711085-supplement-1.pdf [file NIHMS1711085-supplement-1.pdf]

**Learning and Memory**

| Not Reported | Ambiguous | Light | Dark | Both | Total: |
|--------------|-----------|-------|------|------|--------|
| 17           | 3         | 5     | 0    | 0    | 25     |

| Study # | Reference Code                           | Report | Times Cited |
|---------|------------------------------------------|--------|-------------|
| 1       | [van Praag et al., 1999, #78328]         | NR     | 2542        |
| 2       | [Foster and Wilson, 2006, #21306]        | NR     | 803         |
| 3       | [Lee and Wilson, 2002, #75432]           | NR     | 667         |
| 4       | [Dombeck et al., 2010, #4494]            | NR     | 360         |
| 5       | [Nagahara et al., 2009, #12536]          | A      | 579         |
| 6       | [Greig et al., 2005, #27788]             | A      | 449         |
| 7       | [Ragozzino et al., 1999, #69495]         | NR     | 395         |
| 8       | [Bruel-Jungerman et al., 2005, #5557]    | NR     | 344         |
| 9       | [Meshi et al., 2006, #83889]             | NR     | 339         |
| 10      | [Jankowsky et al., 2005, #84276]         | NR     | 333         |
| 11      | [Bach et al., 1995, #44098]              | NR     | 330         |
| 12      | [Haughey et al., 2002, #23444]           | NR     | 328         |
| 13      | [Kitamura et al., 2009, #8520]           | L      | 305         |
| 14      | [Kogan et al., 2000, #4480]              | L      | 288         |
| 15      | [Bruce-Keller et al., 1999, #13270]      | A      | 284         |
| 16      | [Graves et al., 2003, #65550]            | L      | 267         |
| 17      | [Kemp and Manahan-Vaughan, 2004, #72913] | NR     | 227         |
| 18      | [Cao et al., 2007, #86630]               | NR     | 220         |
| 19      | [Wang et al., 2012, #19275]              | L      | 218         |
| 20      | [Wiltgen et al., 2006, #79709]           | L      | 217         |
| 21      | [Ivy et al., 2010, #93749]               | NR     | 211         |
| 22      | [Wei et al., 2005, #24037]               | NR     | 208         |
| 23      | [Mutso et al., 2012, #78417]             | NR     | 205         |
| 24      | [O'Shea et al., 2004, #83685]            | NR     | 193         |
| 25      | [Thirumangalakudi et al., 2008, #22183]  | NR     | 190         |

## Learning and Memory

### Study # Full Reference

- 1 H. van Praag, G. Kempermann, F. H. Gage, Running increases cell proliferation and neurogenesis in the adult mouse dentate gyrus. *Nat. Neurosci.* **2**, 266 (1999).
- 2 D. J. Foster, M. A. Wilson, Reverse replay of behavioural sequences in hippocampal place cells during the awake state. *Nature* **440**, 680 (2006).
- 3 A. K. Lee, M. A. Wilson, Memory of sequential experience in the hippocampus during slow wave sleep. *Neuron* **36**, 1183 (2002).
- 4 D. A. Dombeck, C. D. Harvey, L. Tian, L. L. Looger, D. W. Tank, Functional imaging of hippocampal place cells at cellular resolution during virtual navigation. *Nat. Neurosci.* **13**, 1433 (2010).
- 5 A. H. Nagahara *et al.* , Neuroprotective effects of brain-derived neurotrophic factor in rodent and primate models of alzheimer's disease. *Nat. Med.* **15**, 331 (2009).
- 6 N. H. Greig *et al.* , Selective butyrylcholinesterase inhibition elevates brain acetylcholine, augments learning and lowers alzheimer beta-amyloid peptide in rodent. *Proc. Natl. Acad. Sci. U S A* **102**, 17213 (2005).
- 7 M. E. Ragozzino, S. Detrick, R. P. Kesner, Involvement of the prelimbic-infralimbic areas of the rodent prefrontal cortex in behavioral flexibility for place and response learning. *J. Neurosci.* **19**, 4585 (1999).
- 8 E. Bruel-Jungerman, S. Laroche, C. Rampon, New neurons in the dentate gyrus are involved in the expression of enhanced long-term memory following environmental enrichment. *Eur. J. Neurosci.* **21**, 513 (2005).
- 9 D. Meshi, M. R. Drew, M. Saxe, M. S. Ansorge, D. David..., Hippocampal neurogenesis is not required for behavioral effects of environmental enrichment. *Ann. Neurol.* **9**, 729 (2006).
- 10 J. L. Jankowsky *et al.* , Environmental enrichment mitigates cognitive deficits in a mouse model of alzheimer's disease. *J. Neurosci.* **25**, 5217 (2005).
- 11 M. E. Bach, R. D. Hawkins, M. Osman, E. R. Kandel, M. Mayford, Impairment of spatial but not contextual memory in camkii mutant mice with a selective loss of hippocampal ltp in the range of the theta frequency. *Cell* **81**, 905 (1995).
- 12 N. J. Haughey *et al.* , Disruption of neurogenesis by amyloid beta-peptide, and perturbed neural progenitor cell homeostasis, in models of alzheimer's disease. *J. Neurochem.* **83**, 1509 (2002).
- 13 T. Kitamura *et al.* , Adult neurogenesis modulates the hippocampus-dependent period of associative fear memory. *Cell* **139**, 814 (2009).
- 14 J. H. Kogan, P. W. Frankland, A. J. Silva, Long-term memory underlying hippocampus-dependent social recognition in mice. *Hippocampus* **10**, 47 (2000).
- 15 A. J. Bruce-Keller, G. Umberger, R. McFall, M. P. Mattson, Food restriction reduces brain damage and improves behavioral outcome following excitotoxic and metabolic insults. *Ann. Neurol.* **45**, 8 (1999).
- 16 L. A. Graves, E. A. Heller, A. I. Pack, T. Abel, Sleep deprivation selectively impairs memory consolidation for contextual fear conditioning. *Learn. Mem.* **10**, 168 (2003).
- 17 A. Kemp, D. Manahan-Vaughan, Hippocampal long-term depression and long-term potentiation encode different aspects of novelty acquisition. *Proc. Natl. Acad. Sci. U S A* **101**, 8192 (2004).
- 18 D. Cao, H. Lu, T. L. Lewis, L. Li, Intake of sucrose-sweetened water induces insulin resistance and exacerbates memory deficits and amyloidosis in a transgenic mouse model of alzheimer disease. *J. Biol. Chem.* **282**, 36275 (2007).
- 19 J. Wang *et al.* , Metformin activates an atypical pkc-cbp pathway to promote neurogenesis and enhance spatial memory formation. *J. Psychopharmacol.* **11**, 23 (2012).
- 20 B. J. Wiltgen, M. J. Sanders, S. G. Anagnostaras, J. R. Sage, M. S. Fanselow, Context fear learning in the absence of the hippocampus. *J. Neurosci.* **26**, 5484 (2006).
- 21 A. S. Ivy *et al.* , Hippocampal dysfunction and cognitive impairments provoked by chronic early-life stress involve excessive activation of crh receptors. *J. Neurosci.* **30**, 13005 (2010).
- 22 H. Wei *et al.* , Behavioural study of the d-galactose induced aging model in c57bl/6j mice. *Behav. Brain Res.* **157**, 245 (2005).
- 23 A. A. Mutso *et al.* , Abnormalities in hippocampal functioning with persistent pain. *J. Neurosci.* **32**, 5747 (2012).
- 24 M. O'Shea, M. E. Singh, I. S. McGregor, P. E. Mallet, Chronic cannabinoid exposure produces lasting memory impairment and increased anxiety in adolescent but not adult rats. *J. Psychopharmacol.* **18**, 502 (2004).
- 25 L. Thirumangalakudi *et al.* , High cholesterol-induced neuroinflammation and amyloid precursor protein processing correlate with loss of working memory in mice. *J. Neurochem.* **106**, 475 (2008).

**Sensation and Perception**

| Not Reported | Ambiguous | Light | Dark | Both | Total: |
|--------------|-----------|-------|------|------|--------|
| 21           | 0         | 2     | 2    | 0    | 25     |

| Study # | Reference                            | Report | Times Cited |
|---------|--------------------------------------|--------|-------------|
| 1       | [Bandell et al., 2004, #28057]       | NR     | 1153        |
| 2       | [Ferezou et al., 2007, #73386]       | NR     | 371         |
| 3       | [Talavera et al., 2005, #24343]      | NR     | 274         |
| 4       | [Houweling and Brecht, 2008, #82113] | NR     | 246         |
| 5       | [Chandrashekar et al., 2009, #80147] | NR     | 178         |
| 6       | [Weiss et al., 2011, #34336]         | NR     | 165         |
| 7       | [Ritt et al., 2008, #98379]          | NR     | 145         |
| 8       | [Takashima et al., 2007, #72925]     | NR     | 139         |
| 9       | [O'Connor et al., 2013, #1102]       | NR     | 116         |
| 10      | [Mehta et al., 2007, #25426]         | NR     | 102         |
| 11      | [Tan and McNaughton, 2016, #2950]    | NR     | 93          |
| 12      | [Huang et al., 2011, #29841]         | L      | 91          |
| 13      | [Roza et al., 2004, #257]            | NR     | 83          |
| 14      | [Nagashima and Touhara, 2010, #4640] | NR     | 59          |
| 15      | [Kwon et al., 2016, #91408]          | D      | 51          |
| 16      | [Lolignier et al., 2015, #72659]     | NR     | 39          |
| 17      | [Philippaert et al., 2017, #53852]   | NR     | 40          |
| 18      | [Lafrance et al., 2010, #81451]      | L      | 34          |
| 19      | [Scott et al., 2007, #3027]          | NR     | 28          |
| 20      | [Distrutti et al., 2010, #14635]     | NR     | 26          |
| 21      | [Guo et al., 2015, #88497]           | NR     | 26          |
| 22      | [Pekárková et al., 2001, #66264]     | D      | 25          |
| 23      | [Hong et al., 2018, #15414]          | NR     | 21          |
| 24      | [Wetzel et al., 2017, #18377]        | NR     | 18          |
| 25      | [Voigt et al., 2008, #56975]         | NR     | 20          |

## Sensation and Perception

| Study # | Full Reference                                                                                                                                                                                                         |
|---------|------------------------------------------------------------------------------------------------------------------------------------------------------------------------------------------------------------------------|
| 1       | M. Bandell <i>et al.</i> , Noxious cold ion channel trpa1 is activated by pungent compounds and bradykinin. <i>Neuron</i> <b>41</b> , 849 (2004).                                                                      |
| 2       | I. Ferezou <i>et al.</i> , Spatiotemporal dynamics of cortical sensorimotor integration in behaving mice. <i>Neuron</i> <b>56</b> , 907 (2007).                                                                        |
| 3       | K. Talavera <i>et al.</i> , Heat activation of trpm5 underlies thermal sensitivity of sweet taste. <i>Nature</i> <b>438</b> , 1022 (2005).                                                                             |
| 4       | A. R. Houweling, M. Brecht, Behavioural report of single neuron stimulation in somatosensory cortex. <i>Nature</i> <b>451</b> , 65 (2008).                                                                             |
| 5       | J. Chandrashekar <i>et al.</i> , The taste of carbonation. <i>Science</i> <b>326</b> , 443 (2009).                                                                                                                     |
| 6       | J. Weiss <i>et al.</i> , Loss-of-function mutations in sodium channel nav1.7 cause anosmia. <i>Nature</i> <b>472</b> , 186 (2011).                                                                                     |
| 7       | J. T. Ritt, M. L. Andermann, C. I. Moore, Embodied information processing: Vibrissa mechanics and texture features shape micromotions in actively sensing rats. <i>Neuron</i> <b>57</b> , 599 (2008).                  |
| 8       | Y. Takashima <i>et al.</i> , Diversity in the neural circuitry of cold sensing revealed by genetic axonal labeling of transient receptor potential melastatin 8 neurons. <i>J. Neurosci.</i> <b>27</b> , 14147 (2007). |
| 9       | D. H. O'Connor <i>et al.</i> , Neural coding during active somatosensation revealed using illusory touch. <i>Nat. Neurosci.</i> <b>16</b> , 958 (2013).                                                                |
| 10      | S. B. Mehta, D. Whitmer, R. Figueroa, B. A. Williams, D. Kleinfeld, Active spatial perception in the vibrissa scanning sensorimotor system. <i>PLoS Biol.</i> <b>5</b> , e15 (2007).                                   |
| 11      | C. H. Tan, P. A. McNaughton, The trpm2 ion channel is required for sensitivity to warmth. <i>Nature</i> <b>536</b> , 460 (2016).                                                                                       |
| 12      | S. M. Huang, X. Li, Y. Yu, J. Wang, M. J. Caterina, Trpv3 and trpv4 ion channels are not major contributors to mouse heat sensation. <i>Mol Pain</i> <b>7</b> , 37 (2011).                                             |
| 13      | C. Roza <i>et al.</i> , Knockout of the asic2 channel in mice does not impair cutaneous mechanosensation, visceral mechanonociception and hearing. <i>J. Physiol.</i> <b>558</b> , 659 (2004).                         |
| 14      | A. Nagashima, K. Touhara, Enzymatic conversion of odorants in nasal mucus affects olfactory glomerular activation patterns and odor perception. <i>J. Neurosci.</i> <b>30</b> , 16391 (2010).                          |
| 15      | S. E. Kwon, H. Yang, G. Minamisawa, D. H. O'Connor, Sensory and decision-related activity propagate in a cortical feedback loop during touch perception. <i>Nat. Neurosci.</i> <b>19</b> , 1243 (2016).                |
| 16      | S. Lollignier <i>et al.</i> , The nav1.9 channel is a key determinant of cold pain sensation and cold allodynia. <i>Nat. Neurosci.</i> <b>11</b> , 1067 (2015).                                                        |
| 17      | K. Philippaert <i>et al.</i> , Steviol glycosides enhance pancreatic beta-cell function and taste sensation by potentiation of trpm5 channel activity. <i>Mol Pain</i> <b>8</b> , 14733 (2017).                        |
| 18      | M. LaFrance <i>et al.</i> , Involvement of nts2 receptors in stress-induced analgesia. <i>Neuroscience</i> <b>166</b> , 639 (2010).                                                                                    |
| 19      | J. W. Scott, H. P. Acevedo, L. Sherrill, M. Phan, Responses of the rat olfactory epithelium to retronasal air flow. <i>J. Neurophysiol.</i> <b>97</b> , 1941 (2007).                                                   |
| 20      | E. Distrutti <i>et al.</i> , Hydrogen sulphide induces micro opioid receptor-dependent analgesia in a rodent model of visceral pain. <i>Mol Pain</i> <b>6</b> , 36 (2010).                                             |
| 21      | W. Guo <i>et al.</i> , Hearing the light: Neural and perceptual encoding of optogenetic stimulation in the central auditory pathway. <i>Sci. Rep.</i> <b>5</b> , 10319 (2015).                                         |
| 22      | I. Pekárková <i>et al.</i> , Does exogenous melatonin influence the free radicals metabolism and pain sensation in rat? <i>Physiol. Res.</i> <b>50</b> , 595 (2001).                                                   |
| 23      | Y. K. Hong, C. O. Lacefield, C. C. Rodgers, R. M. Bruno, Sensation, movement and learning in the absence of barrel cortex. <i>Nature</i> <b>561</b> , 542 (2018).                                                      |
| 24      | C. Wetzel <i>et al.</i> , Small-molecule inhibition of stoml3 oligomerization reverses pathological mechanical hypersensitivity. <i>Nat. Neurosci.</i> <b>20</b> , 209 (2017).                                         |
| 25      | B. C. Voigt, M. Brecht, A. R. Houweling, Behavioral detectability of single-cell stimulation in the ventral posterior medial nucleus of the thalamus. <i>J. Neurosci.</i> <b>28</b> , 12362 (2008).                    |

**Attention**

| Not Reported | Ambiguous | Light | Dark | Both | Total: |
|--------------|-----------|-------|------|------|--------|
| 11           | 2         | 3     | 7    | 2    | 25     |

| Study #   | Reference                                    | Report   | Times Cited |
|-----------|----------------------------------------------|----------|-------------|
| 1         | [Frankland et al., 2004, #97566]             | L        | 188         |
| 2         | [Carlezon et al., 2003, #1308]               | A        | 185         |
| 3         | [Passetti et al., 2002, #6866]               | D        | 163         |
| 4         | [van Gaalen et al., 2006, #91165]            | D        | 160         |
| 5         | [Salas et al., 2003, #13856]                 | L        | 143         |
| 6         | [Bari et al., 2009, #22378]                  | D        | 132         |
| 7         | [Koike et al., 2009, #87946]                 | NR       | 124         |
| 8         | [Winstanley et al., 2007, #60113]            | D        | 102         |
| 9         | [Robinson et al., 2008, #45999]              | D        | 95          |
| 10        | [Colacicco et al., 2002, #28513]             | NR       | 88          |
| 11        | [Shirvalkar et al., 2006, #24960]            | NR       | 86          |
| 12        | [Revel et al., 2012, #72691]                 | A        | 83          |
| 13        | [Smith et al., 2014, #17961]                 | NR       | 81          |
| 14        | [Yang et al., 2003, #23871]                  | B        | 80          |
| 15        | [Winstanley et al., 2005, #42005]            | D        | 76          |
| 16        | [Gisquet-Verrier and Delatour, 2006, #19667] | NR       | 64          |
| 17        | [Kozak et al., 2014, #95119]                 | NR       | 60          |
| 18        | [Hosking et al., 2014, #99602]               | NR       | 60          |
| 19        | [Berridge et al., 2012, #83802]              | NR       | 56          |
| 20        | [Chang et al., 2003, #51967]                 | NR       | 56          |
| 21        | [Sanchez-Roige et al., 2014, #42930]         | L        | 55          |
| 22        | [Cocker et al., 2012, #58352]                | NR       | 52          |
| 23        | [Weible et al., 2009, #61304]                | NR       | 52          |
| 24        | [Callahan et al., 2008, #32222]              | B        | 49          |
| <b>25</b> | [Dall et al., 2001, #37474]                  | <b>D</b> | <b>49</b>   |

## Attention

### Study #

### Full Reference

- 1 P. W. Frankland *et al.* , Sensorimotor gating abnormalities in young males with fragile x syndrome and fmr1-knockout mice. *Mol Psychiatry* **9**, 417 (2004).
- 2 W. A. Carlezon, S. D. Mague, S. L. Andersen, Enduring behavioral effects of early exposure to methylphenidate in rats. *Biol Psychiatry* **54**, 1330 (2003).
- 3 F. Passetti, Y. Chudasama, T. W. Robbins, The frontal cortex of the rat and visual attentional performance: Dissociable functions of distinct medial prefrontal subregions. *Cereb. Cortex* **12**, 1254 (2002).
- 4 M. M. van Gaalen, R. J. Brueggeman, P. F. Bronius, A. N. Schoffemeer, L. J. Vanderschuren, Behavioral disinhibition requires dopamine receptor activation. *Cereb. Cortex* **187**, 73 (2006).
- 5 R. Salas *et al.* , The nicotinic acetylcholine receptor subunit alpha 5 mediates short-term effects of nicotine in vivo. *Mol. Pharmacol.* **63**, 1059 (2003).
- 6 A. Bari, D. M. Eagle, A. C. Mar, E. S. Robinson, T. W. Robbins, Dissociable effects of noradrenaline, dopamine, and serotonin uptake blockade on stop task performance in rats. *Mol. Pharmacol.* **205**, 273 (2009).
- 7 H. Koike *et al.* , Behavioral abnormality and pharmacologic response in social isolation-reared mice. *Behav. Brain Res.* **202**, 114 (2009).
- 8 C. A. Winstanley *et al.* , Deltafosb induction in orbitofrontal cortex mediates tolerance to cocaine-induced cognitive dysfunction. *J. Neurosci.* **27**, 10497 (2007).
- 9 E. S. Robinson *et al.* , Opposing roles for 5-ht2a and 5-ht2c receptors in the nucleus accumbens on inhibitory response control in the 5-choice serial reaction time task. *Neuropsychopharmacology* **33**, 2398 (2008).
- 10 G. Colacicco, H. Welzl, H. P. Lipp, H. Würbel, Attentional set-shifting in mice: Modification of a rat paradigm, and evidence for strain-dependent variation. *Behav. Brain Res.* **132**, 95 (2002).
- 11 P. Shirvalkar, M. Seth, N. D. Schiff, D. G. Herrera, Cognitive enhancement with central thalamic electrical stimulation. *Proc. Natl. Acad. Sci. U S A* **103**, 17007 (2006).
- 12 F. G. Revel *et al.* , Trace amine-associated receptor 1 partial agonism reveals novel paradigm for neuropsychiatric therapeutics. *J. Med. Chem.* **72**, 934 (2012).
- 13 A. L. Smith, M. Alexander, T. S. Rosenkrantz, M. L. Sadek, R. H. Fitch, Sex differences in behavioral outcome following neonatal hypoxia ischemia: Insights from a clinical meta-analysis and a rodent model of induced hypoxic ischemic brain injury. *Exp. Neurol.* **254**, 54 (2014).
- 14 P. B. Yang, B. Amini, A. C. Swann, N. Dafny, Strain differences in the behavioral responses of male rats to chronically administered methylphenidate. *Brain Res.* **971**, 139 (2003).
- 15 C. A. Winstanley, C. Baunez, D. E. Theobald, T. W. Robbins, Lesions to the subthalamic nucleus decrease impulsive choice but impair autoshaping in rats: The importance of the basal ganglia in pavlovian conditioning and impulse control. *Eur. J. Neurosci.* **21**, 3107 (2005).
- 16 P. Gisquet-Verrier, B. Delatour, The role of the rat prelimbic/infralimbic cortex in working memory: Not involved in the short-term maintenance but in monitoring and processing functions. *Neuroscience* **141**, 585 (2006).
- 17 R. Kozak *et al.* , Reduction of brain kynurenic acid improves cognitive function. *J. Neurosci.* **34**, 10592 (2014).
- 18 J. G. Hosking, P. J. Cocker, C. A. Winstanley, Dissociable contributions of anterior cingulate cortex and basolateral amygdala on a rodent cost/benefit decision-making task of cognitive effort. *Neuropsychopharmacology* **39**, 1558 (2014).
- 19 C. W. Berridge *et al.* , Differential sensitivity to psychostimulants across prefrontal cognitive tasks: Differential involvement of noradrenergic  $\alpha_1$ - and  $\alpha_2$ -receptors. *J. Med. Chem.* **71**, 467 (2012).
- 20 J. Y. Chang, L. H. Shi, F. Luo, D. J. Woodward, High frequency stimulation of the subthalamic nucleus improves treadmill locomotion in unilateral 6-hydroxydopamine lesioned rats. *Brain Res.* **983**, 174 (2003).
- 21 S. Sanchez-Roige *et al.* , Exaggerated waiting impulsivity associated with human binge drinking, and high alcohol consumption in mice. *Neuropsychopharmacology* **39**, 2919 (2014).
- 22 P. J. Cocker, J. G. Hosking, J. Benoit, C. A. Winstanley, Sensitivity to cognitive effort mediates psychostimulant effects on a novel rodent cost/benefit decision-making task. *Neuropsychopharmacology* **37**, 1825 (2012).
- 23 A. P. Weible, D. C. Rowland, R. Pang, C. Kentros, Neural correlates of novel object and novel location recognition behavior in the mouse anterior cingulate cortex. *J. Neurophysiol.* **102**, 2055 (2009).
- 24 B. L. Callahan, A. S. Gil, A. Levesque, J. S. Mogil, Modulation of mechanical and thermal nociceptive sensitivity in the laboratory mouse by behavioral state. *J. Med. Chem.* **9**, 174 (2008).
- 25 S. R. X. Dall, B. P. Kotler, A. Bouskila, Attention, 'apprehension' and gerbils searching in patches. *J. Med. Chem.* **38**, 15 (2001).

**Food Intake**

| Not Reported | Ambiguous | Light | Dark | Both | Total: |
|--------------|-----------|-------|------|------|--------|
| 2            | 12        | 5     | 2    | 4    | 25     |

| Study #   | Reference                               | Report   | Times Cited |
|-----------|-----------------------------------------|----------|-------------|
| 1         | [Qian et al., 2002, #9206]              | A        | 293         |
| 2         | [Bayol et al., 2007, #20276]            | L        | 252         |
| 3         | [Drazen et al., 2006, #50514]           | L        | 219         |
| 4         | [Haynes et al., 2000, #78388]           | A        | 213         |
| 5         | [Tang-Christensen et al., 2000, #27197] | B        | 197         |
| 6         | [Zhan et al., 2013, #89374]             | A        | 163         |
| 7         | [Proulx et al., 2002, #45588]           | L        | 152         |
| 8         | [Bocarsly et al., 2010, #73473]         | A        | 137         |
| 9         | [Della-Zuana et al., 2002, #43214]      | L        | 136         |
| 10        | [Wiley et al., 2005, #15376]            | A        | 126         |
| 11        | [Colombo et al., 2002, #88782]          | D        | 122         |
| 12        | [Jerlhag, 2008, #13431]                 | NR       | 120         |
| 13        | [Albaugh et al., 2006, #64200]          | A        | 118         |
| 14        | [Ye et al., 2014, #16458]               | B        | 105         |
| 15        | [Mack et al., 2006, #27944]             | A        | 101         |
| 16        | [Cluny et al., 2010, #40807]            | A        | 93          |
| 17        | [Collin et al., 2000, #100777]          | L        | 88          |
| 18        | [Berner et al., 2008, #41065]           | D        | 82          |
| 19        | [Tong et al., 2011, #43735]             | A        | 79          |
| 20        | [Fu et al., 2008, #69129]               | B        | 74          |
| 21        | [Liu et al., 2006, #65942]              | A        | 74          |
| 22        | [Sahu, 2002, #67252]                    | A        | 74          |
| 23        | [Sotak et al., 2005, #74122]            | NR       | 73          |
| 24        | [McBriar et al., 2006, #29419]          | A        | 68          |
| <b>25</b> | [la Fleur et al., 2014, #64525]         | <b>B</b> | <b>67</b>   |

## Food Intake

| Study # | Full Reference                                                                                                                                                                                                                                                  |
|---------|-----------------------------------------------------------------------------------------------------------------------------------------------------------------------------------------------------------------------------------------------------------------|
| 1       | S. Qian <i>et al.</i> , Neither agouti-related protein nor neuropeptide y is critically required for the regulation of energy homeostasis in mice. <i>Mol. Cell. Biol.</i> <b>22</b> , 5027 (2002).                                                             |
| 2       | S. A. Bayol, S. J. Farrington, N. C. Stickland, A maternal 'junk food' diet in pregnancy and lactation promotes an exacerbated taste for 'junk food' and a greater propensity for obesity in rat offspring. <i>Br. J. Nutr.</i> <b>98</b> , 843 (2007).         |
| 3       | D. L. Drazen, T. P. Vahl, D. A. D'Alessio, R. J. Seeley, S. C. Woods, Effects of a fixed meal pattern on ghrelin secretion: Evidence for a learned response independent of nutrient status. <i>Endocrinology</i> <b>147</b> , 23 (2006).                        |
| 4       | A. C. Haynes <i>et al.</i> , A selective orexin-1 receptor antagonist reduces food consumption in male and female rats. <i>Brain Res.</i> <b>96</b> , 45 (2000).                                                                                                |
| 5       | M. Tang-Christensen, P. J. Larsen, J. Thulesen, J. Rømer, N. Vrang, The proglucagon-derived peptide, glucagon-like peptide-2, is a neurotransmitter involved in the regulation of food intake. <i>Nat. Med.</i> <b>6</b> , 802 (2000).                          |
| 6       | C. Zhan <i>et al.</i> , Acute and long-term suppression of feeding behavior by pomc neurons in the brainstem and hypothalamus, respectively. <i>J. Neurosci.</i> <b>33</b> , 3624 (2013).                                                                       |
| 7       | K. Proulx, D. Richard, C. D. Walker, Leptin regulates appetite-related neuropeptides in the hypothalamus of developing rats without affecting food intake. <i>Endocrinology</i> <b>143</b> , 4683 (2002).                                                       |
| 8       | M. E. Bocarsly, E. S. Powell, N. M. Avena, B. G. Hoebel, High-fructose corn syrup causes characteristics of obesity in rats: Increased body weight, body fat and triglyceride levels. <i>Pharmacol. Biochem. Behav.</i> <b>97</b> , 101 (2010).                 |
| 9       | O. Della-Zuana <i>et al.</i> , Acute and chronic administration of melanin-concentrating hormone enhances food intake and body weight in wistar and sprague-dawley rats. <i>Int J Obes Relat Metab Disord</i> <b>26</b> , 1289 (2002).                          |
| 10      | J. L. Wiley <i>et al.</i> , Cb1 cannabinoid receptor-mediated modulation of food intake in mice. <i>Br. J. Pharmacol.</i> <b>145</b> , 293 (2005).                                                                                                              |
| 11      | G. Colombo <i>et al.</i> , Stimulation of voluntary ethanol intake by cannabinoid receptor agonists in ethanol-preferring sp rats. <i>Br. J. Pharmacol.</i> <b>159</b> , 181 (2002).                                                                            |
| 12      | E. Jerlhag, Systemic administration of ghrelin induces conditioned place preference and stimulates accumbal dopamine. <i>Br. J. Pharmacol.</i> <b>13</b> , 358 (2008).                                                                                          |
| 13      | V. L. Albaugh <i>et al.</i> , Hormonal and metabolic effects of olanzapine and clozapine related to body weight in rodents. <i>Obesity (Silver Spring)</i> <b>14</b> , 36 (2006).                                                                               |
| 14      | J. Ye <i>et al.</i> , Glp-1 receptor signaling is not required for reduced body weight after rygb in rodents. <i>Br. J. Pharmacol.</i> <b>306</b> , R352 (2014).                                                                                                |
| 15      | C. M. Mack <i>et al.</i> , Antiobesity action of peripheral exenatide (exendin-4) in rodents: Effects on food intake, body weight, metabolic status and side-effect measures. <i>Int J Obes (Lond)</i> <b>30</b> , 1332 (2006).                                 |
| 16      | N. L. Cluny <i>et al.</i> , A novel peripherally restricted cannabinoid receptor antagonist, am6545, reduces food intake and body weight, but does not cause malaise, in rodents. <i>Br. J. Pharmacol.</i> <b>161</b> , 629 (2010).                             |
| 17      | M. Collin, M. L. Håkansson-Ovesjö, I. Misane, S. O. Ogren, B. Meister, Decreased 5-ht transporter mma in neurons of the dorsal raphe nucleus and behavioral depression in the obese leptin-deficient ob/ob mouse. <i>Brain Res.</i> <b>81</b> , 51 (2000).      |
| 18      | L. A. Berner, N. M. Avena, B. G. Hoebel, Bingeing, self-restriction, and increased body weight in rats with limited access to a sweet-fat diet. <i>Br. J. Pharmacol.</i> <b>16</b> , 1998 (2008).                                                               |
| 19      | J. Tong <i>et al.</i> , Ghrelin enhances olfactory sensitivity and exploratory sniffing in rodents and humans. <i>J. Neurosci.</i> <b>31</b> , 5841 (2011).                                                                                                     |
| 20      | J. Fu, J. Kim, F. Oveisi, G. Astarita, D. Piomelli, Targeted enhancement of oleoylethanolamide production in proximal small intestine induces across-meal satiety in rats. <i>Br. J. Pharmacol.</i> <b>295</b> , R45 (2008).                                    |
| 21      | Y. L. Liu, N. M. Malik, G. J. Sanger, P. L. Andrews, Ghrelin alleviates cancer chemotherapy-associated dyspepsia in rodents. <i>Br. J. Pharmacol.</i> <b>58</b> , 326 (2006).                                                                                   |
| 22      | A. Sahu, Resistance to the satiety action of leptin following chronic central leptin infusion is associated with the development of leptin resistance in neuropeptide y neurones. <i>J. Neuroendocrinol.</i> <b>14</b> , 796 (2002).                            |
| 23      | B. N. Sotak, T. S. Hnasko, S. Robinson, E. J. Kremer, R. D. Palmiter, Dysregulation of dopamine signaling in the dorsal striatum inhibits feeding. <i>Brain Res.</i> <b>1061</b> , 88 (2005).                                                                   |
| 24      | M. D. McBriar <i>et al.</i> , Discovery of orally efficacious melanin-concentrating hormone receptor-1 antagonists as antiobesity agents. Synthesis, sar, and biological evaluation of bicyclo[3.1.0]hexyl ureas. <i>J. Med. Chem.</i> <b>49</b> , 2294 (2006). |
| 25      | S. E. la Fleur, M. C. Luijendijk, E. M. van der Zwaal, M. A. Brans, R. A. Adan, The snacking rat as model of human obesity: Effects of a free-choice high-fat high-sugar diet on meal patterns. <i>Brain Res.</i> <b>38</b> , 643 (2014).                       |

**Mating**

| Not Reported | Ambiguous | Light | Dark | Both | Total: |
|--------------|-----------|-------|------|------|--------|
| 8            | 5         | 5     | 6    | 1    | 25     |

| Study #   | Reference                                  | Report   | Times Cited |
|-----------|--------------------------------------------|----------|-------------|
| 1         | [Lin et al., 2011, #71225]                 | NR       | 390         |
| 2         | [Gingrich et al., 2000, #87939]            | NR       | 192         |
| 3         | [Bakker et al., 2006, #47276]              | NR       | 185         |
| 4         | [Ross et al., 2009, #93288]                | A        | 182         |
| 5         | [Panksepp et al., 2007, #17458]            | D        | 175         |
| 6         | [Bosch et al., 2009, #35424]               | L        | 116         |
| 7         | [Apostolakis et al., 2000, #77440]         | NR       | 80          |
| 8         | [Liu et al., 2010, #39912]                 | A        | 61          |
| 9         | [delBarco-Trillo and Ferkin, 2006, #54966] | L        | 58          |
| 10        | [Asher et al., 2008, #36485]               | A        | 56          |
| 11        | [Willis and Poulin, 2000, #97113]          | D        | 54          |
| 12        | [Roullet et al., 2011, #91453]             | L        | 53          |
| 13        | [Resendez et al., 2013, #90275]            | NR       | 52          |
| 14        | [Kennaway et al., 2004, #32409]            | B        | 51          |
| 15        | [Young et al., 2014, #90776]               | NR       | 49          |
| 16        | [Song et al., 2010, #51284]                | L        | 49          |
| 17        | [Frye and Rhodes, 2006, #2450]             | A        | 45          |
| 18        | [Maras and Petrulis, 2006, #26326]         | D        | 44          |
| 19        | [Zenuto et al., 2001, #1571]               | A        | 44          |
| 20        | [Willadsen et al., 2014, #54847]           | L        | 43          |
| 21        | [Ramm et al., 2008, #64057]                | D        | 43          |
| 22        | [Patisaul et al., 2004, #52651]            | D        | 42          |
| 23        | [Remedios et al., 2017, #47765]            | NR       | 36          |
| 24        | [Woodley and Baum, 2004, #98260]           | NR       | 35          |
| <b>25</b> | [Hellier et al., 2018, #33226]             | <b>D</b> | <b>31</b>   |

## Mating

| Study # | Full Reference                                                                                                                                                                                                                                                                                                                                                                                                                                            |
|---------|-----------------------------------------------------------------------------------------------------------------------------------------------------------------------------------------------------------------------------------------------------------------------------------------------------------------------------------------------------------------------------------------------------------------------------------------------------------|
| 1       | D. Lin <i>et al.</i> , Functional identification of an aggression locus in the mouse hypothalamus. <i>Nature</i> <b>470</b> , 221 (2011).                                                                                                                                                                                                                                                                                                                 |
| 2       | B. Gingrich, Y. Liu, C. Cascio, Z. Wang, T. R. Insel, Dopamine d2 receptors in the nucleus accumbens are important for social attachment in female prairie voles ( <i>Microtus ochrogaster</i> ). <i>Behav. Neurosci.</i> <b>114</b> , 173 (2000).                                                                                                                                                                                                        |
| 3       | J. Bakker <i>et al.</i> , Alpha-fetoprotein protects the developing female mouse brain from masculinization and defeminization by estrogens. <i>Nat. Neurosci.</i> <b>9</b> , 220 (2006).                                                                                                                                                                                                                                                                 |
| 4       | H. E. Ross <i>et al.</i> , Variation in oxytocin receptor density in the nucleus accumbens has differential effects on affiliative behaviors in monogamous and polygamous voles. <i>J. Neurosci.</i> <b>29</b> , 1312 (2009).                                                                                                                                                                                                                             |
| 5       | J. B. Panksepp <i>et al.</i> , Affiliative behavior, ultrasonic communication and social reward are influenced by genetic variation in adolescent mice. <i>PLoS One</i> <b>2</b> , e351 (2007).                                                                                                                                                                                                                                                           |
| 6       | O. J. Bosch, H. P. Nair, T. H. Ahern, I. D. Neumann, L. J. Young, The crf system mediates increased passive stress-coping behavior following the loss of a bonded partner in a monogamous rodent. <i>Neuropsychopharmacology</i> <b>34</b> , 1406 (2009).                                                                                                                                                                                                 |
| 7       | E. M. Apostolakis, J. Garai, J. E. Lohmann, J. H. Clark, B. W. O'Malley, Epidermal growth factor activates reproductive behavior independent of ovarian steroids in female rodents. <i>Mol. Endocrinol.</i> <b>14</b> , 1086 (2000).                                                                                                                                                                                                                      |
| 8       | Y. Liu <i>et al.</i> , Nucleus accumbens dopamine mediates amphetamine-induced impairment of social bonding in a monogamous rodent species. <i>Proc. Natl. Acad. Sci. USA</i> <b>107</b> , 1217 (2010).                                                                                                                                                                                                                                                   |
| 9       | J. delBarco-Trillo, M. H. Ferkin, Male meadow voles respond differently to risk and intensity of sperm competition. <i>Behavioral Ecology</i> <b>17</b> , 581 (2006).                                                                                                                                                                                                                                                                                     |
| 10      | M. Asher <i>et al.</i> , Large males dominate: Ecology, social organization, and mating system of wild cavies, the ancestors of the guinea pig. <i>Behavioral Ecology and Sociobiology</i> <b>62</b> , 1509 (2008).                                                                                                                                                                                                                                       |
| 11      | C. Willis, R. Poulin, Preference of female rats for the odours of non-parasitised males: The smell of good genes. <i>Mol. Endocrinol.</i> <b>47</b> , 6 (2000).                                                                                                                                                                                                                                                                                           |
| 12      | F. I. Rouillet, M. Wöhr, J. N. Crawley, Female urine-induced male mice ultrasonic vocalizations, but not scent-marking, is modulated by social experience. <i>Behav. Brain Res.</i> <b>216</b> , 19 (2011).                                                                                                                                                                                                                                               |
| 13      | S. L. Resendez <i>et al.</i> , M-opioid receptors within subregions of the striatum mediate pair bond formation through parallel yet distinct reward mechanisms. <i>J. Neurosci.</i> <b>33</b> , 9140 (2013).                                                                                                                                                                                                                                             |
| 14      | D. J. Kennaway, M. J. Boden, A. Voultios, Reproductive performance in female clock delta19 mutant mice. <i>Reprod. Fertil. Dev.</i> <b>16</b> , 801 (2004).                                                                                                                                                                                                                                                                                               |
| 15      | K. A. Young, Y. Liu, K. L. Gobrogge, H. Wang, Z. Wang, Oxytocin reverses amphetamine-induced deficits in social bonding: Evidence for an interaction with nucleus accumbens dopamine. <i>J. Neurosci.</i> <b>34</b> , 8499 (2014).                                                                                                                                                                                                                        |
| 16      | Z. Song <i>et al.</i> , Sexual or paternal experiences alter alloparental behavior and the central expression of $\alpha$ and $\delta$ in male mandarin voles ( <i>Microtus mandarinus</i> ). <i>Behav. Brain Res.</i> <b>214</b> , 290 (2010).                                                                                                                                                                                                           |
| 17      | C. A. Frye, M. E. Rhodes, Infusions of 5 $\alpha$ -pregnan-3 $\alpha$ -ol-20-one (3 $\alpha$ ,5 $\alpha$ -thp) to the ventral tegmental area, but not the substantia nigra, enhance exploratory, anti-anxiety, social and sexual behaviours and concomitantly increase 3 $\alpha$ ,5 $\alpha$ -thp concentrations in the hippocampus, diencephalon and cortex of ovariectomised oestrogen-primed rats. <i>J. Neuroendocrinol.</i> <b>18</b> , 960 (2006). |
| 18      | P. M. Maras, A. Petrucci, Chemosensory and steroid-responsive regions of the medial amygdala regulate distinct aspects of opposite-sex odor preference in male syrian hamsters. <i>Eur. J. Neurosci.</i> <b>24</b> , 3541 (2006).                                                                                                                                                                                                                         |
| 19      | R. R. Zenuto, A. I. Vassallo, C. Busch, A method for studying social and reproductive behaviour of subterranean rodents in captivity. <i>Acta Theriologica</i> <b>46</b> , 161 (2001).                                                                                                                                                                                                                                                                    |
| 20      | M. Willadsen, D. Seffer, R. K. Schwarting, M. Wöhr, Rodent ultrasonic communication: Male prosocial 50-khz ultrasonic vocalizations elicit social approach behavior in female rats ( <i>Rattus norvegicus</i> ). <i>J. Comp. Psychol.</i> <b>128</b> , 56 (2014).                                                                                                                                                                                         |
| 21      | S. A. Ramm, S. A. Cheetham, J. L. Hurst, Encoding choosiness: Female attraction requires prior physical contact with individual male scents in mice. <i>J. Comp. Psychol.</i> <b>275</b> , 1727 (2008).                                                                                                                                                                                                                                                   |
| 22      | H. B. Patisaul, J. R. Luskin, M. E. Wilson, A soy supplement and tamoxifen inhibit sexual behavior in female rats. <i>Horm. Behav.</i> <b>45</b> , 270 (2004).                                                                                                                                                                                                                                                                                            |
| 23      | R. Remedios <i>et al.</i> , Social behaviour shapes hypothalamic neural ensemble representations of conspecific sex. <i>Nature</i> <b>550</b> , 388 (2017).                                                                                                                                                                                                                                                                                               |
| 24      | S. K. Woodley, M. J. Baum, Differential activation of glomeruli in the ferret's main olfactory bulb by anal scent gland odours from males and females: An early step in mate identification. <i>Eur. J. Neurosci.</i> <b>20</b> , 1025 (2004).                                                                                                                                                                                                            |
| 25      | V. Hellier <i>et al.</i> , Female sexual behavior in mice is controlled by kisspeptin neurons. <i>Horm. Behav.</i> <b>9</b> , 400 (2018).                                                                                                                                                                                                                                                                                                                 |

**Maternal**

| Not Reported | Ambiguous | Light | Dark | Both | Total: |
|--------------|-----------|-------|------|------|--------|
| 9            | 3         | 4     | 4    | 5    | 25     |

| Study #   | Reference                            | Report    | Times Cited |
|-----------|--------------------------------------|-----------|-------------|
| 1         | [Franklin et al., 2010, #40662]      | NR        | 580         |
| 2         | [Deacon, 2006, #56043]               | D         | 364         |
| 3         | [Champagne and Meaney, 2006, #44038] | B         | 288         |
| 4         | [Smith et al., 2004, #13736]         | B         | 185         |
| 5         | [Ross et al., 2009, #93288]          | A         | 184         |
| 6         | [Branchi et al., 2006, #57473]       | B         | 147         |
| 7         | [Veenema et al., 2007, #73936]       | D         | 140         |
| 8         | [Olazábal and Young, 2006, #13937]   | NR        | 133         |
| 9         | [Malter Cohen et al., 2013, #55014]  | D         | 131         |
| 10        | [Ricceri et al., 2006, #23340]       | NR        | 127         |
| 11        | [Rayen et al., 2011, #89301]         | L         | 111         |
| 12        | [Gammie and Nelson, 2001, #3199]     | L         | 97          |
| 13        | [Chamero et al., 2011, #55747]       | NR        | 95          |
| 14        | [Tang et al., 2006, #29062]          | B         | 94          |
| 15        | [Scattoni et al., 2008, #93606]      | D         | 91          |
| 16        | [Tsuneoka et al., 2013, #71185]      | NR        | 76          |
| 17        | [Larsen et al., 2008, #71157]        | A         | 72          |
| 18        | [Levine et al., 2012, #58300]        | A         | 70          |
| 19        | [Pardon et al., 2000, #35622]        | NR        | 67          |
| 20        | [Jia et al., 2009, #4760]            | NR        | 66          |
| 21        | [Debiec and Sullivan, 2014, #98090]  | NR        | 65          |
| 22        | [Friske and Gammie, 2005, #14715]    | L         | 64          |
| 23        | [Calatayud et al., 2004, #50155]     | L         | 64          |
| 24        | [Baharnoori et al., 2012, #26784]    | B         | 28          |
| <b>25</b> | [Bowers et al., 2013, #23092]        | <b>NR</b> | <b>57</b>   |

## Maternal

| Study # | Full Reference                                                                                                                                                                                                                                                                |
|---------|-------------------------------------------------------------------------------------------------------------------------------------------------------------------------------------------------------------------------------------------------------------------------------|
| 1       | T. B. Franklin <i>et al.</i> , Epigenetic transmission of the impact of early stress across generations. <i>Eur. J. Neurosci.</i> <b>68</b> , 408 (2010).                                                                                                                     |
| 2       | R. M. Deacon, Assessing nest building in mice. <i>Eur. J. Neurosci.</i> <b>1</b> , 1117 (2006).                                                                                                                                                                               |
| 3       | F. A. Champagne, M. J. Meaney, Stress during gestation alters postpartum maternal care and the development of the offspring in a rodent model. <i>Eur. J. Neurosci.</i> <b>59</b> , 1227 (2006).                                                                              |
| 4       | J. W. Smith, J. R. Seckl, A. T. Evans, B. Costall, J. W. Smythe, Gestational stress induces post-partum depression-like behaviour and alters maternal care in rats. <i>J. Neurosci.</i> <b>29</b> , 227 (2004).                                                               |
| 5       | H. E. Ross <i>et al.</i> , Variation in oxytocin receptor density in the nucleus accumbens has differential effects on affiliative behaviors in monogamous and polygamous voles. <i>J. Neurosci.</i> <b>29</b> , 1312 (2009).                                                 |
| 6       | I. Branchi <i>et al.</i> , Early social enrichment shapes social behavior and nerve growth factor and brain-derived neurotrophic factor levels in the adult mouse brain. <i>Eur. J. Neurosci.</i> <b>60</b> , 690 (2006).                                                     |
| 7       | A. H. Veenema, R. Bredewold, I. D. Neumann, Opposite effects of maternal separation on intermale and maternal aggression in c57bl/6 mice: Link to hypothalamic vasopressin and oxytocin immunoreactivity. <i>Eur. J. Neurosci.</i> <b>32</b> , 437 (2007).                    |
| 8       | D. E. Olazábal, L. J. Young, Species and individual differences in juvenile female alloparental care are associated with oxytocin receptor density in the striatum and the lateral septum. <i>Horm. Behav.</i> <b>49</b> , 681 (2006).                                        |
| 9       | M. Malter Cohen <i>et al.</i> , Early-life stress has persistent effects on amygdala function and development in mice and humans. <i>Proc. Natl. Acad. Sci. US A</i> <b>110</b> , 18274 (2013).                                                                               |
| 10      | L. Ricceri <i>et al.</i> , Developmental neurotoxicity of organophosphorous pesticides: Fetal and neonatal exposure to chlorpyrifos alters sex-specific behaviors at adulthood in mice. <i>Proc. Natl. Acad. Sci. US A</i> <b>93</b> , 105 (2006).                            |
| 11      | I. Rayen, D. L. van den Hove, J. Prickaerts, H. W. Steinbusch, J. L. Pawluski, Fluoxetine during development reverses the effects of prenatal stress on depressive-like behavior and hippocampal neurogenesis in adolescence. <i>PLoS One</i> <b>6</b> , e24003 (2011).       |
| 12      | S. C. Gammie, R. J. Nelson, Cfos and pcreb activation and maternal aggression in mice. <i>Brain Res.</i> <b>898</b> , 232 (2001).                                                                                                                                             |
| 13      | P. Chamero <i>et al.</i> , G protein g(alpha)o is essential for vomeronasal function and aggressive behavior in mice. <i>Proc. Natl. Acad. Sci. US A</i> <b>108</b> , 12898 (2011).                                                                                           |
| 14      | A. C. Tang, K. G. Akers, B. C. Reeb, R. D. Romeo, B. S. McEwen, Programming social, cognitive, and neuroendocrine development by early exposure to novelty. <i>Proc. Natl. Acad. Sci. US A</i> <b>103</b> , 15716 (2006).                                                     |
| 15      | M. L. Scattoni <i>et al.</i> , Reduced ultrasonic vocalizations in vasopressin 1b knockout mice. <i>Behav. Brain Res.</i> <b>187</b> , 371 (2008).                                                                                                                            |
| 16      | Y. Tsuneoka <i>et al.</i> , Functional, anatomical, and neurochemical differentiation of medial preoptic area subregions in relation to maternal behavior in the mouse. <i>J. Comp. Neurol.</i> <b>521</b> , 1633 (2013).                                                     |
| 17      | C. M. Larsen, I. C. Kokay, D. R. Grattan, Male pheromones initiate prolactin-induced neurogenesis and advance maternal behavior in female mice. <i>Horm. Behav.</i> <b>53</b> , 509 (2008).                                                                                   |
| 18      | A. Levine, T. R. Worrell, R. Zimnisky, C. Schmauss, Early life stress triggers sustained changes in histone deacetylase expression and histone h4 modifications that alter responsiveness to adolescent antidepressant treatment. <i>Horm. Behav.</i> <b>45</b> , 488 (2012). |
| 19      | M. Pardon, P. Gérardin, C. Joubert, F. Pérez-Díaz, C. Cohen-Salmon, Influence of prepartum chronic ultramild stress on maternal pup care behavior in mice. <i>Brain Res.</i> <b>47</b> , 858 (2000).                                                                          |
| 20      | R. Jia, F. Tai, S. An, X. Zhang, H. Broders, Effects of neonatal paternal deprivation or early deprivation on anxiety and social behaviors of the adults in mandarin voles. <i>Horm. Behav.</i> <b>82</b> , 271 (2009).                                                       |
| 21      | J. Debiec, R. M. Sullivan, Intergenerational transmission of emotional trauma through amygdala-dependent mother-to-infant transfer of specific fear. <i>Proc. Natl. Acad. Sci. US A</i> <b>111</b> , 12222 (2014).                                                            |
| 22      | J. E. Fiske, S. C. Gammie, Environmental enrichment alters plus maze, but not maternal defense performance in mice. <i>Physiol. Behav.</i> <b>85</b> , 187 (2005).                                                                                                            |
| 23      | F. Calatayud, S. Coubard, C. Belzung, Emotional reactivity in mice may not be inherited but influenced by parents. <i>Physiol. Behav.</i> <b>80</b> , 465 (2004).                                                                                                             |
| 24      | M. Bahamoori, S. K. Bhardwaj, L. K. Srivastava, Neonatal behavioral changes in rats with gestational exposure to lipopolysaccharide: A prenatal infection model for developmental neuropsychiatric disorders. <i>Physiol. Behav.</i> <b>38</b> , 444 (2012).                  |
| 25      | J. M. Bowers, M. Perez-Pouchoulen, N. S. Edwards, M. M. McCarthy, Foxp2 mediates sex differences in ultrasonic vocalization by rat pups and directs order of maternal retrieval. <i>J. Neurosci.</i> <b>33</b> , 3276 (2013).                                                 |

## Aggression

| Not Reported | Ambiguous | Light | Dark | Both | Total: |
|--------------|-----------|-------|------|------|--------|
| 8            | 0         | 5     | 12   | 0    | 25     |

| Study # | Reference                           | Report | Times Cited |
|---------|-------------------------------------|--------|-------------|
| 1       | [Sánchez et al., 2003, #25576]      | D      | 211         |
| 2       | [Oyegbile and Marler, 2005, #74177] | D      | 191         |
| 3       | [Branchi et al., 2006, #57473]      | D      | 149         |
| 4       | [Veenema et al., 2007, #73936]      | D      | 142         |
| 5       | [Nelson et al., 1995, #50996]       | NR     | 129         |
| 6       | [Ricceri et al., 2006, #23340]      | NR     | 127         |
| 7       | [Kayasuga et al., 2007, #76871]     | L      | 115         |
| 8       | [Veenema et al., 2010, #79323]      | D      | 99          |
| 9       | [Gammie and Nelson, 2001, #3199]    | L      | 97          |
| 10      | [Chamero et al., 2011, #55747]      | NR     | 95          |
| 11      | [Scattoni et al., 2008, #93606]     | D      | 91          |
| 12      | [Dekeyne et al., 2008, #4817]       | NR     | 85          |
| 13      | [Padilla et al., 2016, #59675]      | NR     | 80          |
| 14      | [Trainor et al., 2008, #22904]      | D      | 79          |
| 15      | [Matsumoto et al., 2003, #75566]    | D      | 78          |
| 16      | [Pagani et al., 2015, #73001]       | D      | 77          |
| 17      | [Burgdorf et al., 2009, #62076]     | NR     | 67          |
| 18      | [Bibancos et al., 2007, #12831]     | L      | 64          |
| 19      | [Caramaschi et al., 2008, #68896]   | D      | 62          |
| 20      | [Klein et al., 2004, #94038]        | D      | 58          |
| 21      | [Halász et al., 2006, #12099]       | D      | 51          |
| 22      | [Nicolas et al., 2001, #81203]      | L      | 49          |
| 23      | [Bannai et al., 2007, #69594]       | NR     | 47          |
| 24      | [Yu et al., 2012, #42704]           | NR     | 40          |
| 25      | [Centenaro et al., 2008, #56647]    | L      | 38          |

## Aggression

| Study # | Full Reference                                                                                                                                                                                                                                                     |
|---------|--------------------------------------------------------------------------------------------------------------------------------------------------------------------------------------------------------------------------------------------------------------------|
| 1       | C. Sánchez <i>et al.</i> , Escitalopram, the s-(+)-enantiomer of citalopram, is a selective serotonin reuptake inhibitor with potent effects in animal models predictive of antidepressant and anxiolytic activities. <i>Brain Res.</i> <b>167</b> , 353 (2003).   |
| 2       | T. O. Oyegbile, C. A. Marler, Winning fights elevates testosterone levels in California mice and enhances future ability to win fights. <i>Horm. Behav.</i> <b>48</b> , 259 (2005).                                                                                |
| 3       | I. Branchi <i>et al.</i> , Early social enrichment shapes social behavior and nerve growth factor and brain-derived neurotrophic factor levels in the adult mouse brain. <i>Eur. J. Neurosci.</i> <b>60</b> , 690 (2006).                                          |
| 4       | A. H. Veenema, R. Bredewold, I. D. Neumann, Opposite effects of maternal separation on intermale and maternal aggression in c57bl/6 mice: Link to hypothalamic vasopressin and oxytocin immunoreactivity. <i>Eur. J. Neurosci.</i> <b>32</b> , 437 (2007).         |
| 5       | R. J. Nelson <i>et al.</i> , Behavioural abnormalities in male mice lacking neuronal nitric oxide synthase. <i>Nature</i> <b>378</b> , 383 (1995).                                                                                                                 |
| 6       | L. Ricceri <i>et al.</i> , Developmental neurotoxicity of organophosphorous pesticides: Fetal and neonatal exposure to chlorpyrifos alters sex-specific behaviors at adulthood in mice. <i>Proc. Natl. Acad. Sci. U S A</i> <b>93</b> , 105 (2006).                |
| 7       | Y. Kayasuga <i>et al.</i> , Alteration of behavioural phenotype in mice by targeted disruption of the progranulin gene. <i>Behav. Brain Res.</i> <b>185</b> , 110 (2007).                                                                                          |
| 8       | A. H. Veenema, D. I. Beiderbeck, M. Lukas, I. D. Neumann, Distinct correlations of vasopressin release within the lateral septum and the bed nucleus of the stria terminalis with the display of intermale aggression. <i>Horm. Behav.</i> <b>58</b> , 273 (2010). |
| 9       | S. C. Gammie, R. J. Nelson, Cfos and pcreb activation and maternal aggression in mice. <i>Brain Res.</i> <b>898</b> , 232 (2001).                                                                                                                                  |
| 10      | P. Chamero <i>et al.</i> , G protein $\alpha_o$ is essential for vomeronasal function and aggressive behavior in mice. <i>Proc. Natl. Acad. Sci. U S A</i> <b>108</b> , 12898 (2011).                                                                              |
| 11      | M. L. Scattoni <i>et al.</i> , Reduced ultrasonic vocalizations in vasopressin 1b knockout mice. <i>Behav. Brain Res.</i> <b>187</b> , 371 (2008).                                                                                                                 |
| 12      | A. Dekeyne <i>et al.</i> , S32006, a novel 5-HT <sub>2C</sub> receptor antagonist displaying broad-based antidepressant and anxiolytic properties in rodent models. <i>Horm. Behav.</i> <b>199</b> , 549 (2008).                                                   |
| 13      | S. L. Padilla <i>et al.</i> , Agouti-related peptide neural circuits mediate adaptive behaviors in the starved state. <i>Nat. Neurosci.</i> <b>19</b> , 734 (2016).                                                                                                |
| 14      | B. C. Trainor, M. S. Finy, R. J. Nelson, Rapid effects of estradiol on male aggression depend on photoperiod in reproductively non-responsive mice. <i>Horm. Behav.</i> <b>53</b> , 192 (2008).                                                                    |
| 15      | T. Matsumoto, S. Honda, N. Harada, Alteration in sex-specific behaviors in male mice lacking the aromatase gene. <i>Neuroendocrinology</i> <b>77</b> , 416 (2003).                                                                                                 |
| 16      | J. H. Pagani <i>et al.</i> , Role of the vasopressin 1b receptor in rodent aggressive behavior and synaptic plasticity in hippocampal area ca2. <i>Mol Psychiatry</i> <b>20</b> , 490 (2015).                                                                      |
| 17      | J. Burgdorf <i>et al.</i> , The effects of selective breeding for differential rates of 50-kHz ultrasonic vocalizations on emotional behavior in rats. <i>Anim. Behav.</i> <b>51</b> , 34 (2009).                                                                  |
| 18      | T. Bibancos, D. L. Jardim, I. Aneas, S. Chiavegatto, Social isolation and expression of serotonergic neurotransmission-related genes in several brain areas of male mice. <i>Genes Brain Behav</i> <b>6</b> , 529 (2007).                                          |
| 19      | D. Caramaschi, S. F. de Boer, H. de Vries, J. M. Koolhaas, Development of violence in mice through repeated victory along with changes in prefrontal cortex neurochemistry. <i>Behav. Brain Res.</i> <b>189</b> , 263 (2008).                                      |
| 20      | S. L. Klein, M. C. Zink, G. E. Glass, Seoul virus infection increases aggressive behaviour in male Norway rats. <i>Anim. Behav.</i> <b>67</b> , 421 (2004).                                                                                                        |
| 21      | J. Halász, M. Tóth, I. Kalló, Z. Liposits, J. Haller, The activation of prefrontal cortical neurons in aggression—a double labeling study. <i>Behav. Brain Res.</i> <b>175</b> , 166 (2006).                                                                       |
| 22      | L. B. Nicolas <i>et al.</i> , Aggressive behavior induced by the steroid sulfatase inhibitor coumate and by dheas in cba/h mice. <i>Brain Res.</i> <b>922</b> , 216 (2001).                                                                                        |
| 23      | M. Bannai, E. W. Fish, S. Faccidomo, K. A. Miczek, Anti-aggressive effects of agonists at 5-HT <sub>1B</sub> receptors in the dorsal raphe nucleus of mice. <i>Behav. Brain Res.</i> <b>193</b> , 295 (2007).                                                      |
| 24      | P. Yu <i>et al.</i> , The effects of neonatal paternal deprivation on pair bonding, nacc dopamine receptor mRNA expression and serum corticosterone in mandarin voles. <i>Horm. Behav.</i> <b>61</b> , 669 (2012).                                                 |
| 25      | L. A. Centenaro <i>et al.</i> , Social instigation and aggressive behavior in mice: Role of 5-HT <sub>1A</sub> and 5-HT <sub>1B</sub> receptors in the prefrontal cortex. <i>Horm. Behav.</i> <b>201</b> , 237 (2008).                                             |

**Drug Seeking**

| Not Reported | Ambiguous | Light | Dark | Both | Total: |
|--------------|-----------|-------|------|------|--------|
| 8            | 2         | 5     | 7    | 3    | 25     |

| Study #   | Reference                               | Report   | Times Cited |
|-----------|-----------------------------------------|----------|-------------|
| 1         | [Koya et al., 2009, #28008]             | D        | 152         |
| 2         | [Mantsch et al., 2004, #8184]           | D        | 140         |
| 3         | [Noonan et al., 2010, #367]             | NR       | 133         |
| 4         | [Fernández-Teruel et al., 2002, #33470] | NR       | 109         |
| 5         | [DePoy et al., 2013, #10561]            | B        | 108         |
| 6         | [Li et al., 2008, #78402]               | NR       | 107         |
| 7         | [Rogers and See, 2007, #66839]          | NR       | 97          |
| 8         | [Uz et al., 2005, #46930]               | D        | 97          |
| 9         | [Malkesman et al., 2010, #92429]        | B        | 95          |
| 10        | [Pan et al., 2008, #70592]              | NR       | 94          |
| 11        | [Hopf et al., 2010, #51738]             | B        | 93          |
| 12        | [Shoblock et al., 2011, #31208]         | L        | 92          |
| 13        | [Brimijoin et al., 2008, #10821]        | L        | 92          |
| 14        | [Cowen et al., 2005, #68454]            | NR       | 91          |
| 15        | [Wee et al., 2008, #22640]              | D        | 90          |
| 16        | [Meinhardt et al., 2013, #92044]        | D        | 89          |
| 17        | [Warnault et al., 2013, #6617]          | A        | 82          |
| 18        | [Amen et al., 2011, #65253]             | NR       | 82          |
| 19        | [Neasta et al., 2010, #14269]           | A        | 81          |
| 20        | [Thanos et al., 2008, #100246]          | D        | 80          |
| 21        | [Nadal et al., 2002, #3120]             | L        | 74          |
| 22        | [Jerlhag and Engel, 2011, #40907]       | NR       | 73          |
| 23        | [Lenoir and Ahmed, 2007, #99222]        | D        | 71          |
| 24        | [Slaker et al., 2015, #15085]           | L        | 69          |
| <b>25</b> | [Shiflett et al., 2010, #34167]         | <b>L</b> | <b>68</b>   |

## Drug Seeking

| Study # | Full Reference                                                                                                                                                                                                                                                                                                                  |
|---------|---------------------------------------------------------------------------------------------------------------------------------------------------------------------------------------------------------------------------------------------------------------------------------------------------------------------------------|
| 1       | E. Koya <i>et al.</i> , Role of ventral medial prefrontal cortex in incubation of cocaine craving. <i>Neuropharmacology</i> <b>56 Suppl 1</b> , 177 (2009).                                                                                                                                                                     |
| 2       | J. R. Mantsch, V. Yufarov, A. M. Mathieu-Kia, A. Ho, M. J. Kreek, Effects of extended access to high versus low cocaine doses on self-administration, cocaine-induced reinstatement and brain mma levels in rats. <i>Genome Res.</i> <b>175</b> , 26 (2004).                                                                    |
| 3       | M. A. Noonan, S. E. Bulin, D. C. Fuller, A. J. Eisch, Reduction of adult hippocampal neurogenesis confers vulnerability in an animal model of cocaine addiction. <i>J. Neurosci.</i> <b>30</b> , 304 (2010).                                                                                                                    |
| 4       | A. Fernández-Teruel <i>et al.</i> , A quantitative trait locus influencing anxiety in the laboratory rat. <i>Genome Res.</i> <b>12</b> , 618 (2002).                                                                                                                                                                            |
| 5       | L. DePoy <i>et al.</i> , Chronic alcohol produces neuroadaptations to prime dorsal striatal learning. <i>Proc. Natl. Acad. Sci. U S A</i> <b>110</b> , 14783 (2013).                                                                                                                                                            |
| 6       | Y. Q. Li <i>et al.</i> , Central amygdala extracellular signal-regulated kinase signaling pathway is critical to incubation of opiate craving. <i>J. Neurosci.</i> <b>28</b> , 13248 (2008).                                                                                                                                    |
| 7       | J. L. Rogers, R. E. See, Selective inactivation of the ventral hippocampus attenuates cue-induced and cocaine-primed reinstatement of drug-seeking in rats. <i>Neurobiol Learn Mem</i> <b>87</b> , 688 (2007).                                                                                                                  |
| 8       | T. Uz <i>et al.</i> , The regional and cellular expression profile of the melatonin receptor mt1 in the central dopaminergic system. <i>Brain Res Mol Brain Res</i> <b>136</b> , 45 (2005).                                                                                                                                     |
| 9       | O. Malkesman <i>et al.</i> , The female urine sniffing test: A novel approach for assessing reward-seeking behavior in rodents. <i>Biol Psychiatry</i> <b>67</b> , 864 (2010).                                                                                                                                                  |
| 10      | B. Pan, C. J. Hillard, Q. S. Liu, Endocannabinoid signaling mediates cocaine-induced inhibitory synaptic plasticity in midbrain dopamine neurons. <i>J. Neurosci.</i> <b>28</b> , 1385 (2008).                                                                                                                                  |
| 11      | F. W. Hopf, S. J. Chang, D. R. Sparta, M. S. Bowers, A. Bonci, Motivation for alcohol becomes resistant to quinine adulteration after 3 to 4 months of intermittent alcohol self-administration. <i>Alcohol Clin Exp Res</i> <b>34</b> , 1565 (2010).                                                                           |
| 12      | J. R. Shoblock <i>et al.</i> , Selective blockade of the orexin-2 receptor attenuates ethanol self-administration, place preference, and reinstatement. <i>Psychopharmacology (Berl)</i> <b>215</b> , 191 (2011).                                                                                                               |
| 13      | S. Brimijoin <i>et al.</i> , A cocaine hydrolase engineered from human butyrylcholinesterase selectively blocks cocaine toxicity and reinstatement of drug seeking in rats. <i>Neuropsychopharmacology</i> <b>33</b> , 2715 (2008).                                                                                             |
| 14      | M. S. Cowen, E. Djouma, A. J. Lawrence, The metabotropic glutamate 5 receptor antagonist 3-[(2-methyl-1,3-thiazol-4-yl)ethynyl]-pyridine reduces ethanol self-administration in multiple strains of alcohol-preferring rats and regulates olfactory glutamatergic systems. <i>J Pharmacol Exp Ther</i> <b>315</b> , 590 (2005). |
| 15      | S. Wee, C. D. Mandyam, D. M. Letic, G. F. Koob, Alpha 1-noradrenergic system role in increased motivation for cocaine intake in rats with prolonged access. <i>J. Neurosci.</i> <b>18</b> , 303 (2008).                                                                                                                         |
| 16      | M. W. Meirhardt <i>et al.</i> , Rescue of infralimbic mglur2 deficit restores control over drug-seeking behavior in alcohol dependence. <i>J. Neurosci.</i> <b>33</b> , 2794 (2013).                                                                                                                                            |
| 17      | V. Warnault, E. Darcq, A. Levine, S. Barak, D. Ron, Chromatin remodeling--a novel strategy to control excessive alcohol drinking. <i>Transl. Psychiatry</i> <b>3</b> , e231 (2013).                                                                                                                                             |
| 18      | S. L. Amen <i>et al.</i> , Repeated n-acetyl cysteine reduces cocaine seeking in rodents and craving in cocaine-dependent humans. <i>Neuropsychopharmacology</i> <b>36</b> , 871 (2011).                                                                                                                                        |
| 19      | J. Neasta, S. Ben Hamida, Q. Yowell, S. Carnicella, D. Ron, Role for mammalian target of rapamycin complex 1 signaling in neuroadaptations underlying alcohol-related disorders. <i>Proc. Natl. Acad. Sci. U S A</i> <b>107</b> , 20093 (2010).                                                                                 |
| 20      | P. K. Thanos, M. Michaelides, H. Umegaki, N. D. Volkow, D2r DNA transfer into the nucleus accumbens attenuates cocaine self-administration in rats. <i>Transl. Psychiatry</i> <b>62</b> , 481 (2008).                                                                                                                           |
| 21      | R. Nadal, A. Armario, P. H. Janak, Positive relationship between activity in a novel environment and operant ethanol self-administration in rats. <i>Psychopharmacology (Berl)</i> <b>162</b> , 333 (2002).                                                                                                                     |
| 22      | E. Jerlhag, J. A. Engel, Ghrelin receptor antagonism attenuates nicotine-induced locomotor stimulation, accumbal dopamine release and conditioned place preference in mice. <i>J. Neurosci.</i> <b>117</b> , 126 (2011).                                                                                                        |
| 23      | M. Lenoir, S. H. Ahmed, Heroin-induced reinstatement is specific to compulsive heroin use and dissociable from heroin reward and sensitization. <i>Neuropsychopharmacology</i> <b>32</b> , 616 (2007).                                                                                                                          |
| 24      | M. Slaker <i>et al.</i> , Removal of perineuronal nets in the medial prefrontal cortex impairs the acquisition and reconsolidation of a cocaine-induced conditioned place preference memory. <i>J. Neurosci.</i> <b>35</b> , 4190 (2015).                                                                                       |
| 25      | M. W. Shiflett, R. A. Brown, B. W. Balleine, Acquisition and performance of goal-directed instrumental actions depends on erk signaling in distinct regions of dorsal striatum in rats. <i>J. Neurosci.</i> <b>30</b> , 2951 (2010).                                                                                            |

| Summary Report                    | Ambiguous | Not Reported | Light | Dark  | Both |                     |
|-----------------------------------|-----------|--------------|-------|-------|------|---------------------|
| <b>Learning &amp; Memory</b>      | 3         | 17           | 5     | 0     | 0    |                     |
| <b>Sensation &amp; Perception</b> | 0         | 21           | 2     | 2     | 0    |                     |
| <b>Attention</b>                  | 2         | 11           | 3     | 7     | 2    |                     |
| <b>Food Intake</b>                | 12        | 2            | 5     | 2     | 4    |                     |
| <b>Mating</b>                     | 5         | 8            | 5     | 6     | 1    |                     |
| <b>Maternal</b>                   | 3         | 9            | 4     | 4     | 5    |                     |
| <b>Aggression</b>                 | 0         | 8            | 5     | 12    | 0    |                     |
| <b>Drug Seeking</b>               | 2         | 8            | 5     | 7     | 3    | <b>Total Papers</b> |
| <b>Category Total:</b>            | 27        | 84           | 34    | 40    | 15   | 200                 |
| <b>% Of Reporting</b>             | 13.5%     | 42.0%        | 17.0% | 20.0% | 7.5% |                     |
